# Supplementary material for: Binding of fullerenes to amyloid beta fibrils: size matters
Source: Royal Society of Chemistry journal article supplement (doi:10.1039/c4cp02348j), 2014-08-07
Supplement: c4cp02348j10.pdf [file c4cp02348j10.pdf]

**Supporting information for:**

**Binding of fullerenes to amyloid beta fibrils: size matters**

Pham Dinh Quoc Huy<sup>†</sup> and Mai Suan Li<sup>\*,‡</sup>

*Institute for Computational Science and Technology, 6 Quarter, Linh Trung Ward, Thu Duc District, Ho Chi Minh City, Vietnam, and Institute of Physics, Polish Academy of Sciences, Al. Lotnikow 32/46, 02-668 Warsaw, Poland*

E-mail: masli@ifpan.edu.pl

---

\*To whom correspondence should be addressed

<sup>†</sup>Institute for Computational Science and Technology

<sup>‡</sup>Institute of Physics

Table S1: Summary of MD simulation details for all systems.  $\tau_{total}$  is a total simulation time, while  $\tau_{eq}$  stands for the equilibration time. Times are measured in ns.  $N_{water}$  refers to the number of water molecules in the box of size  $d_{box}$ .

| System                  | $\tau_{total}$ | $\tau_{eq}$ | $N_{water}$ | $d_{box}(\text{\AA})$ |
|-------------------------|----------------|-------------|-------------|-----------------------|
| $5A\beta_{17-42}$       | 25             | 9           | 5448        | 65.08                 |
| $5A\beta_{17-42} + C20$ | 40             | 17          | 6896        | 69.51                 |
| $5A\beta_{17-42} + C36$ | 60             | 29          | 6901        | 69.60                 |
| $5A\beta_{17-42} + C60$ | 100            | 71          | 5384        | 64.94                 |
| $5A\beta_{17-42} + C70$ | 25             | 13          | 5610        | 65.69                 |
| $5A\beta_{17-42} + C84$ | 25             | 13          | 5547        | 65.39                 |
| $12A\beta_{9-40}$       | 20             | 2.5         | 20260       | 99.20                 |
| $12A\beta_{9-40} + C20$ | 20             | 7           | 20269       | 99.21                 |
| $12A\beta_{9-40} + C36$ | 20             | 8           | 19883       | 98.66                 |
| $12A\beta_{9-40} + C60$ | 20             | 8           | 20338       | 99.31                 |
| $12A\beta_{9-40} + C70$ | 35             | 17          | 18752       | 96.96                 |
| $12A\beta_{9-40} + C84$ | 39             | 25          | 18749       | 96.91                 |

Table S2: Shown are amino acids which have the equilibrium contact population with fullerene exceeding 50%. Non-polar, basic polar, polar and acidic polar residues are colored gray, green, blue and orange, respectively.

| Systems                 | $N_{SC}$ | Important amino acids                                                                                                                                                                             |
|-------------------------|----------|---------------------------------------------------------------------------------------------------------------------------------------------------------------------------------------------------|
| $5A\beta_{17-42} + C20$ | 12       | A21-A, <b>D23-A</b> , F19-B, A21-B, <b>D23-B</b> , <b>K28-B</b> , I32-B, L34-B, A21-C, <b>D23-C</b> , I32-C, L34-C                                                                                |
| $5A\beta_{17-42} + C36$ | 13       | L17-B, L17-C, F19-C, F19-D, A21-D, G38-D, A21-E, <b>E22-E</b> , V24-E, G37-E, G38-E, V39-E, I41-E                                                                                                 |
| $5A\beta_{17-42} + C60$ | 16       | F20-A, A21-A, <b>E22-A</b> , <b>D23-A</b> , <b>S26-A</b> , <b>K28-A</b> , G29-A, A30-A, I31-A, I32-A, G33-A, L34-A, I31-B, I32-B, G33-B, L34-B                                                    |
| $5A\beta_{17-42} + C70$ | 13       | M35-A, V39-A, I41-A, A42-A, G33-B, M35-B, V39-B, I31-C, G33-C, M35-C, G33-D, M35-D, G33-E                                                                                                         |
| $5A\beta_{17-42} + C84$ | 11       | G33-A, M35-A, I31-B, G33-B, M35-B, I31-C, I32-C, G33-C, M35-C, I31-D, G33-D                                                                                                                       |
| $12A\beta_{9-40} + C20$ | 9        | L17-B, <b>Q15-C</b> , L17-C, <b>Q15-D</b> , L17-D, V36-D, V36-E, G37-E, V36-F                                                                                                                     |
| $12A\beta_{9-40} + C36$ | 13       | F19-A, F20-A, <b>D23-A</b> , V24-A, G25-A, <b>S26-A</b> , I32-A, L34-A, A30-B, I32-B, L34-B, I32-C, L34-C                                                                                         |
| $12A\beta_{9-40} + C60$ | 12       | F19-D, L17-E, F19-E, L17-F, F19-F, G33-F, L34-F, V36-F, V40-F, M35-L, G38-L, V39-L                                                                                                                |
| $12A\beta_{9-40} + C70$ | 16       | F19-E, A21-E, <b>D23-E</b> , L17-F, F19-F, A21-F, <b>N27-F</b> , <b>K28-F</b> , G29-F, A30-F, I31-F, I32-F, G33-F, <b>Y10-L</b> , V12-L, <b>H14-L</b>                                             |
| $12A\beta_{9-40} + C84$ | 20       | F19-D, F19-E, A21-E, <b>E22-E</b> , <b>D23-E</b> , L17-F, F19-F, A21-F, <b>D23-F</b> , G25-F, <b>S26-F</b> , <b>N27-F</b> , <b>K28-F</b> , G29-F, A30-F, I31-F, I32-F, G9-L, <b>Y10-L</b> , V12-L |

Table S3: Population of salt bridge ASP23-LYS28 for  $5A\beta_{17-42}$  systems. Results were obtained in equilibrium

| Chain | $5A\beta_{17-42}$ | $5A\beta_{17-42} + C20$ | $5A\beta_{17-42} + C36$ | $5A\beta_{17-42} + C60$ | $5A\beta_{17-42} + C70$ | $5A\beta_{17-42} + C84$ |
|-------|-------------------|-------------------------|-------------------------|-------------------------|-------------------------|-------------------------|
| A     | 45.35             | 0                       | 0                       | 0                       | 0.16                    | 0                       |
| B     | 99.88             | 98.78                   | 100                     | 90.38                   | 100                     | 99.92                   |
| C     | 100               | 100                     | 99.97                   | 99.86                   | 100                     | 100                     |
| D     | 100               | 99.96                   | 99.97                   | 99.81                   | 100                     | 100                     |
| E     | 100               | 99.57                   | 4.13                    | 20.70                   | 100                     | 100                     |

Table S4: Population of salt bridge ASP23-LYS28 for  $12A\beta_{9-40}$  systems. Results were obtained in equilibrium

| Chain | $12A\beta_{9-40}$ | $12A\beta_{9-40} + C20$ | $12A\beta_{9-40} + C36$ | $12A\beta_{9-40} + C60$ | $12A\beta_{9-40} + C70$ | $12A\beta_{9-40} + C84$ |
|-------|-------------------|-------------------------|-------------------------|-------------------------|-------------------------|-------------------------|
| A     | 9.14              | 0                       | 0                       | 0                       | 0                       | 0                       |
| B     | 0.23              | 0                       | 0                       | 0                       | 0                       | 84.78                   |
| C     | 0.11              | 0                       | 0                       | 0                       | 0                       | 0                       |
| D     | 0                 | 0                       | 0                       | 0                       | 0                       | 0                       |
| E     | 0                 | 0                       | 0                       | 0                       | 0                       | 0                       |
| F     | 0                 | 0                       | 0                       | 0                       | 0                       | 0                       |
| G     | 98.17             | 0                       | 0                       | 0                       | 0                       | 0                       |
| H     | 0                 | 0                       | 0                       | 0                       | 0                       | 0                       |
| I     | 0                 | 0                       | 0                       | 0                       | 0                       | 0                       |
| J     | 0                 | 0                       | 12.05                   | 0                       | 0                       | 0                       |
| K     | 0                 | 0                       | 0.97                    | 0                       | 0                       | 0                       |
| L     | 0                 | 0                       | 21.13                   | 73.61                   | 0                       | 0                       |

Table S5: Mean values of the number of fibril contacts for  $5A\beta_{17-42}$  and  $12A\beta_{9-40}$  with and without fullerenes. Results were obtained in equilibrium. The PDB structures of  $5A\beta_{17-42}$  and  $12A\beta_{9-40}$  have 161 and 503 FCs, respectively.

| System                  | FC    | System                  | FC    |
|-------------------------|-------|-------------------------|-------|
| $5A\beta_{17-42}$       | 100.3 | $12A\beta_{9-40}$       | 325.1 |
| $5A\beta_{17-42} + C20$ | 97.2  | $12A\beta_{9-40} + C20$ | 288.5 |
| $5A\beta_{17-42} + C36$ | 95.3  | $12A\beta_{9-40} + C36$ | 302.3 |
| $5A\beta_{17-42} + C60$ | 72.8  | $12A\beta_{9-40} + C60$ | 290.6 |
| $5A\beta_{17-42} + C70$ | 100.0 | $12A\beta_{9-40} + C70$ | 297.6 |
| $5A\beta_{17-42} + C84$ | 110.1 | $12A\beta_{9-40} + C84$ | 285.4 |

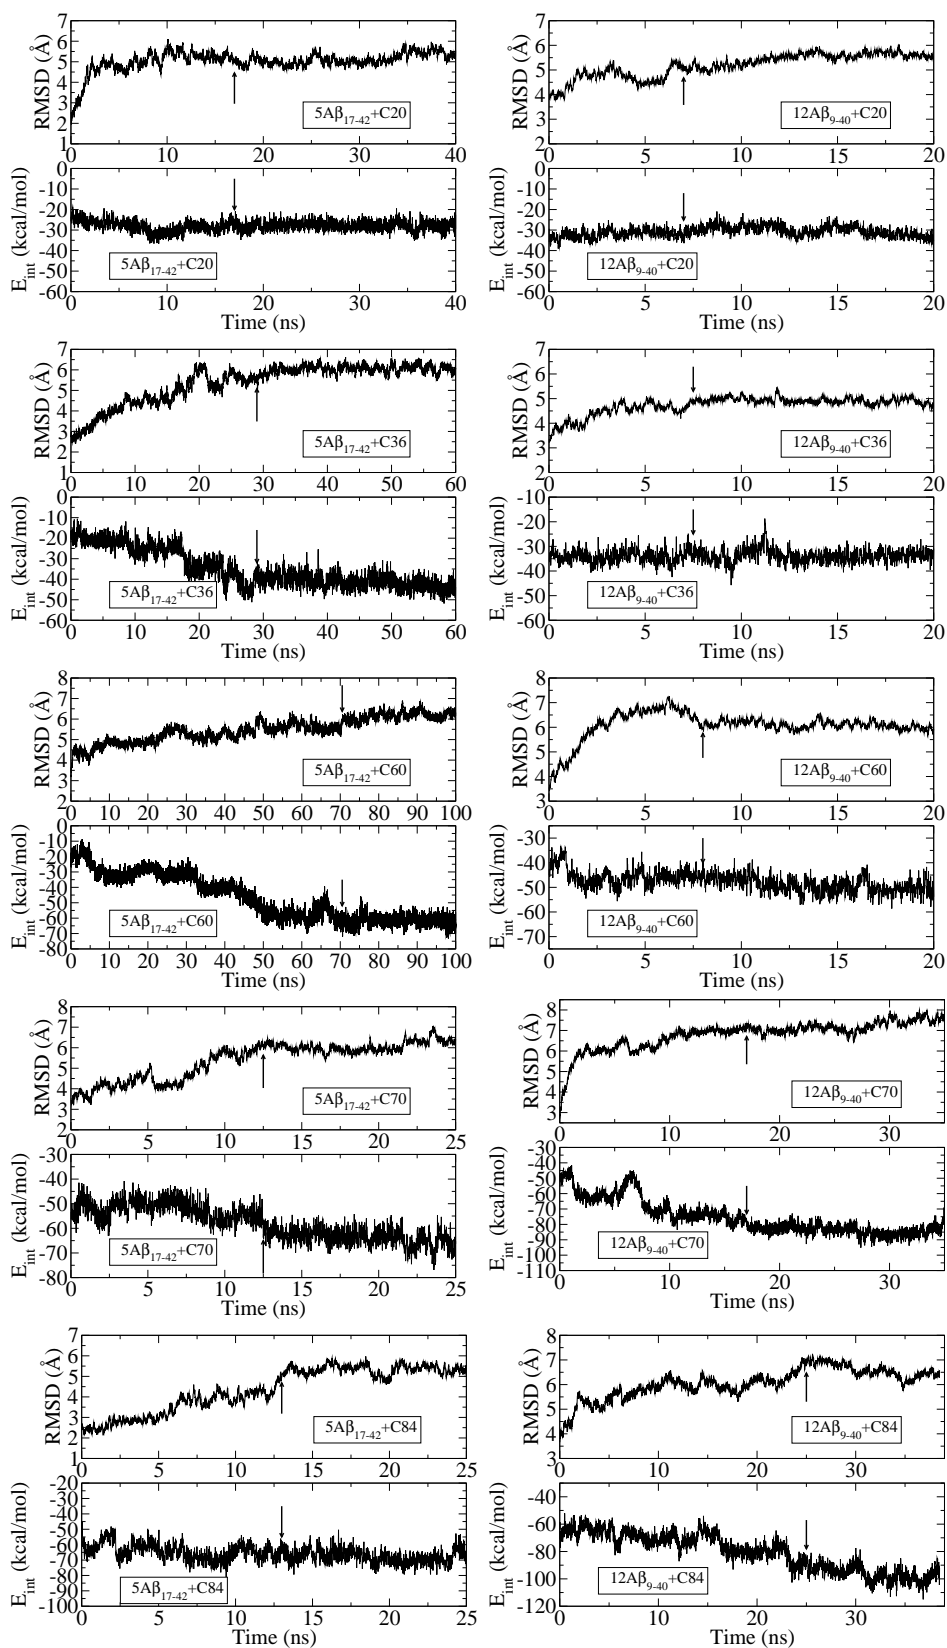

Figure S1: Time dependence of of root mean square deviation (RMSD) and interaction energy ( $E_{int}$ ) for 5A $\beta$ <sub>17-42</sub> (left) and for 12A $\beta$ <sub>9-40</sub> (right). Arrow refers to  $\tau_{eq}$  where the system reach equilibrium and snapshots collected after this moment were used for estimation of  $\Delta G_{bind}$  by MM-PBSA method.

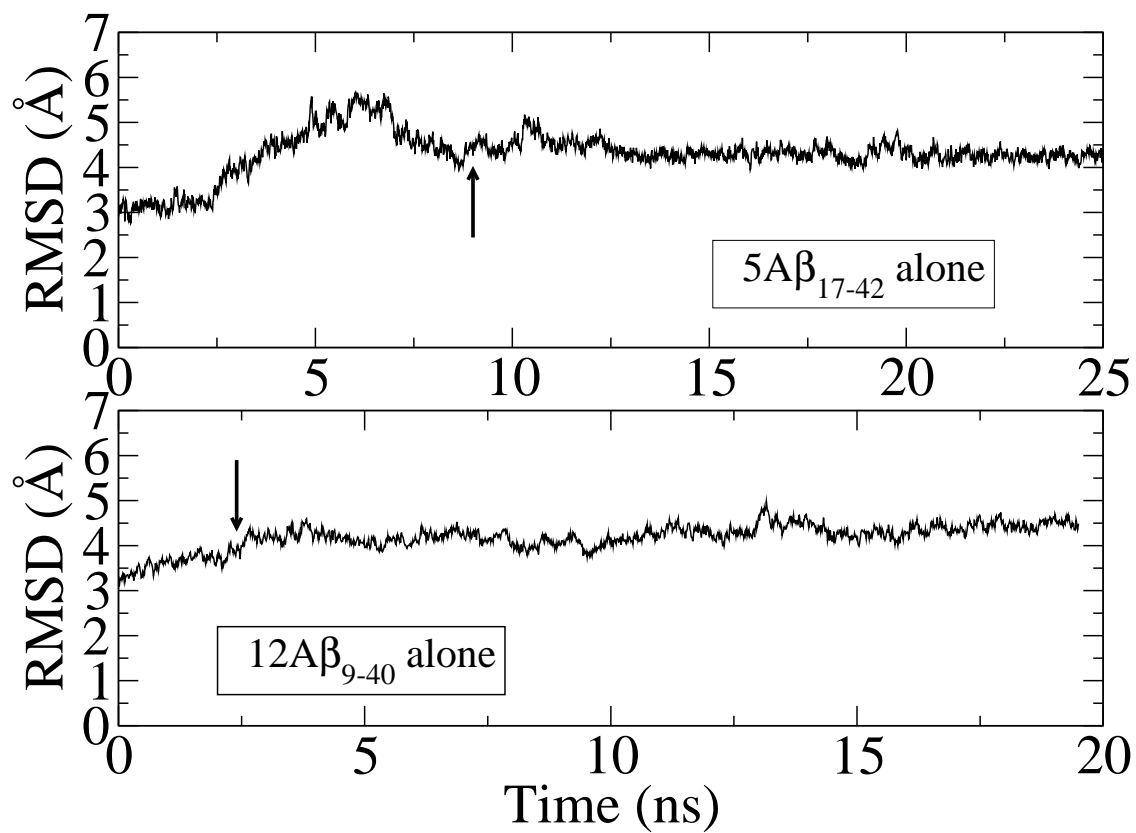

Figure S2: Evolution of RMSD of  $5A\beta_{17-42}$  and  $12A\beta_{9-40}$  without fullerenes. Arrow refers to the equilibration time  $\tau_{eq}$ . Clearly these systems get equilibrated faster than those with fullerene.

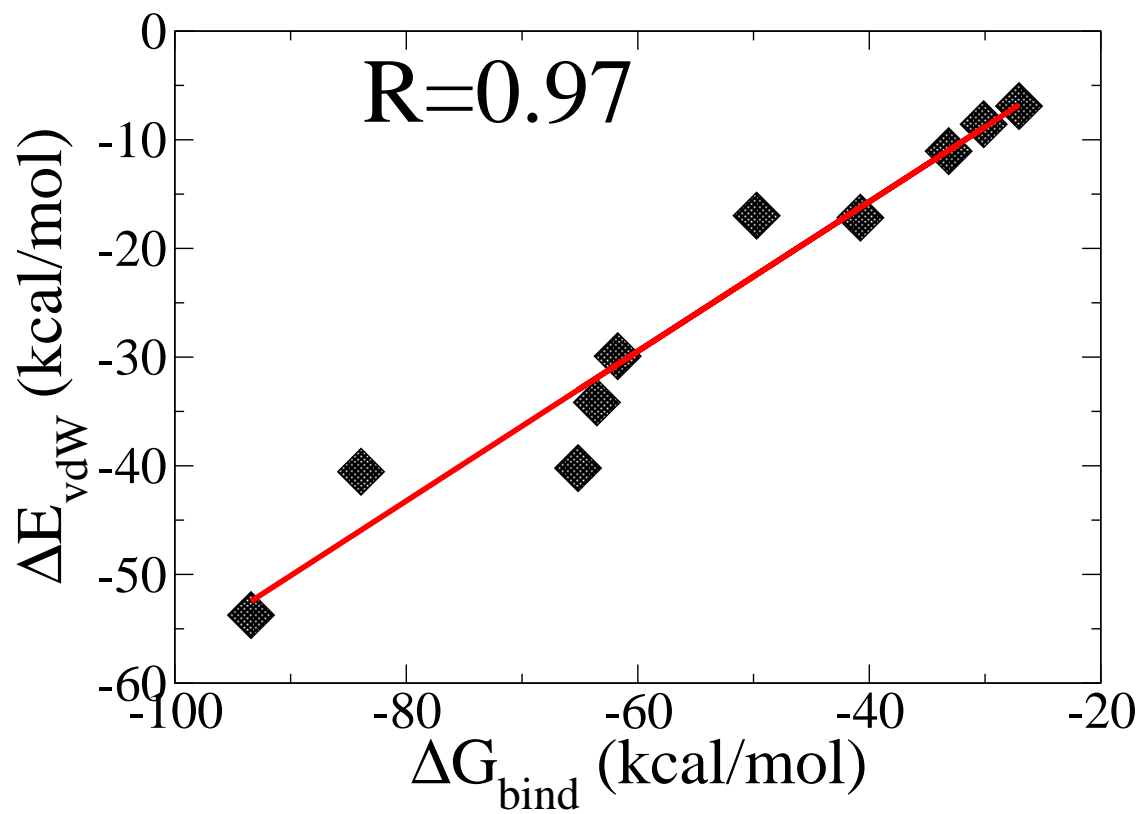

Figure S3: The correlation between  $\Delta G_{bind}$  and vdW interaction energy. The correlation level  $R=0.97$ .



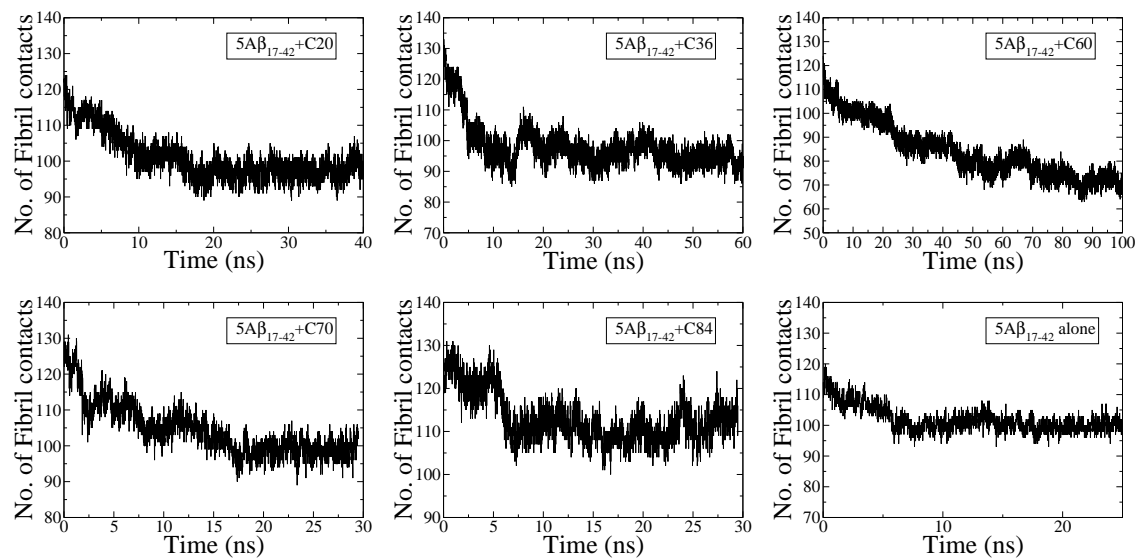

Figure S4: Evolution of fibril contacts for  $5A\beta_{17-42}$  and complexes of  $5A\beta_{17-42}$  +fullerenes. The PDB structure of  $5A\beta_{17-42}$  has 161 FCs.

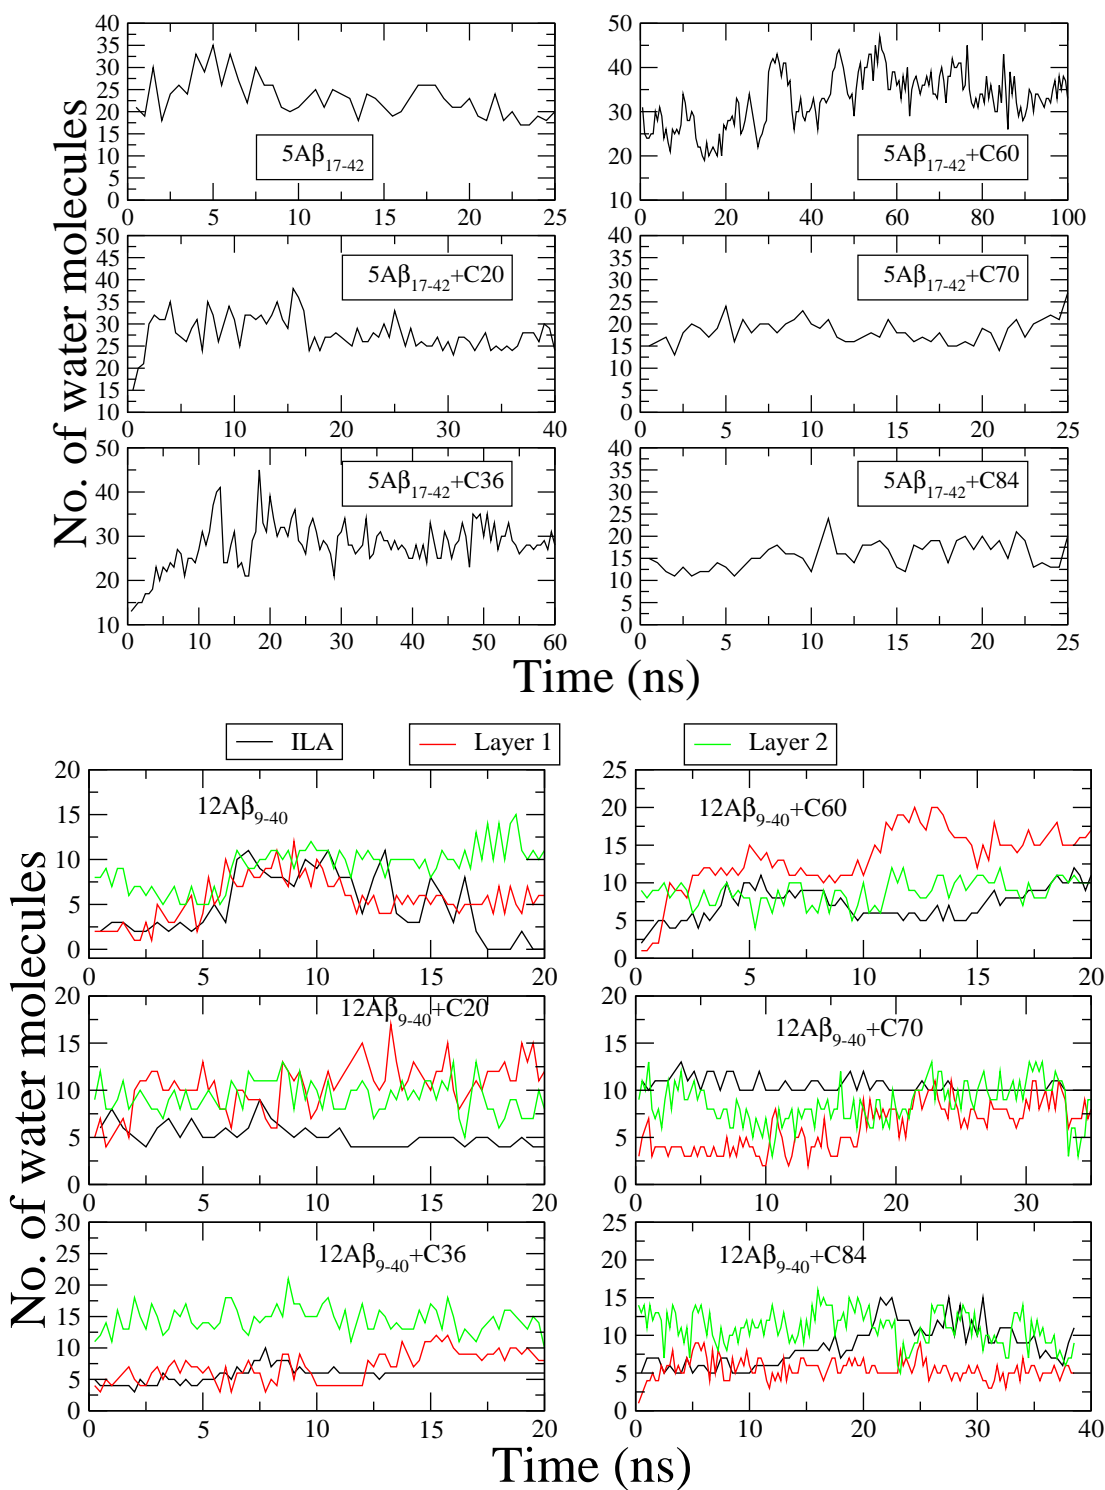

Figure S5: Time dependence of water molecules in the interior of  $5A\beta_{17-42}$  (upper panel), and of two layers of  $12A\beta_{9-40}$  and ILA (lower panel) in the presence and absence of fullerenes.

**Movie 1.** Movement of C20 in the complex with 5A $\beta_{17-42}$  during MD simulations.

**Movie 2.** Movement of C84 in the complex with 5A $\beta_{17-42}$  during MD simulations.

**Movie 3.** Movement of C60 in the complex with 5A $\beta_{17-42}$  during MD simulations.

**Movie 4.** Movement of C60 in the complex with 12A $\beta_{9-40}$  during MD simulations.

**Movie 5.** Movement of C36 in the complex with 5A $\beta_{17-42}$  during MD simulations.

**Movie 6.** Movement of C36 in the complex with 12A $\beta_{9-40}$  during MD simulations.

**Movie 7.** Movement of C70 in the complex with 12A $\beta_{9-40}$  during MD simulations.

**Movie 8.** Movement of C84 in the complex with 12A $\beta_{9-40}$  during MD simulations.

## **Coordinates of structures obtained in the best docking mode**

In this section the coordinates of the structures, obtained in the best docking mode for all buckyballs with two targets  $5A\beta_{17-42}$  and  $12A\beta_{9-40}$ , are supplied in the PDB format. For instance, the coordinates of the 2BEG-C60 complex are stored in file "2begC60.pdb". In order to help a reader to quickly reproduce our plots in Pymol we also provide script files with extension pml. For example, to see the location of C60 near 2BEG as in Fig. 2 in the main text one has to type the command "pymol 2begC60.pml".
